# Supplementary material
Source: ML conference proceedings conference paper supplement (https://openreview.net/forum?id=v38DXhUcoeU)
Supplement: supplementary_material [file attachment]

## Pre-study questionnaire

Tesserae Participant ID: \_\_\_\_\_

1. Have you continued to use self-tracking wearable(s) after the Tesserae study?
  - ☐ Yes
  - ☐ No
2. If yes, which kind? \_\_\_\_\_
3. How often do you wear these wearable(s)?
  - ☐ Never
  - ☐ A few times a month
  - ☐ A few times a week
  - ☐ Almost all the time
4. Do you browse the mobile app(s) associated with these wearable(s)?
  - ☐ Yes
  - ☐ No
5. How frequently do you use these apps?
  - ☐ Never
  - ☐ A few times a month
  - ☐ A few times a week
  - ☐ Almost all the time
6. How frequently do you browse your past data on these apps?
  - ☐ Never
  - ☐ A few times a month
  - ☐ A few times a week
  - ☐ Almost all the time

7. How would you rate your familiarity with general interactive visualizations and visual tools found on the web, media etc.?

| 1                   | 2                 | 3                 | 4                   | 5                  |
|---------------------|-------------------|-------------------|---------------------|--------------------|
| Not at all familiar | Slightly familiar | Somewhat familiar | Moderately familiar | Extremely familiar |

8. Do you use any of the following vision aids? Select all that apply.

- ☐ Glasses
- ☐ Contact lens
- ☐ None

9. Are you color blind?

- ☐ Yes
- ☐ No
- ☐ I don't know
