# Supplementary material
Source: ML conference proceedings conference paper supplement (https://openreview.net/forum?id=v38DXhUcoeU)
Supplement: supplementary_material [file attachment]

## Free Exploration

Explore the visualization interface freely. You can select any of the options as you like. During this exploration, tell me about your thought process: What are you doing on the interface? Why? What information are you seeing? What does the information tell you? What are you reminded of by this information? What do you think are the possible reasons for the information that you are seeing on the interface?

Please let me know when you have finished exploring the data on the interface.
