# Supplementary material
Source: ML conference proceedings conference paper supplement (https://openreview.net/forum?id=v38DXhUcoeU)
Supplement: supplementary_material [file attachment]

Participants’ ratings for the User Engagement questionnaire. Median ratings are indicated in gray.

Focused Attention (FA)

FA1. I lost myself in this experience.

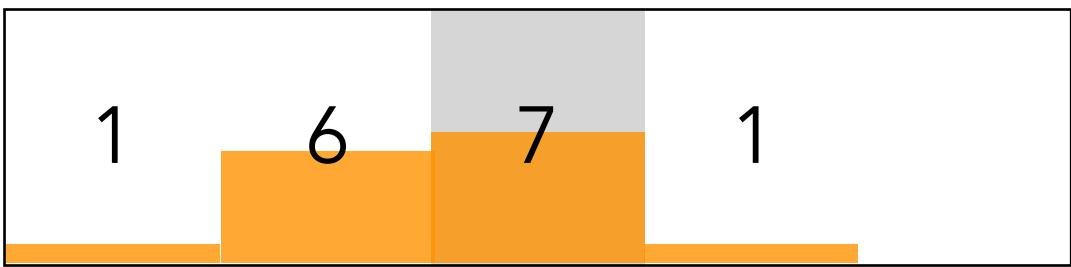

FA2. The time I spent using the visualization interface just slipped away.

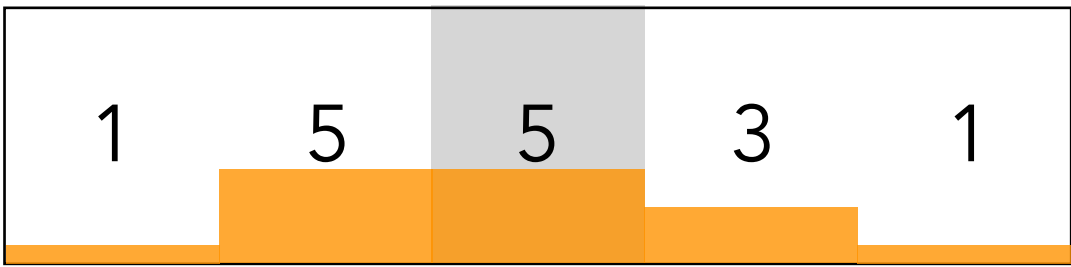

FA3. I was absorbed in this experience.

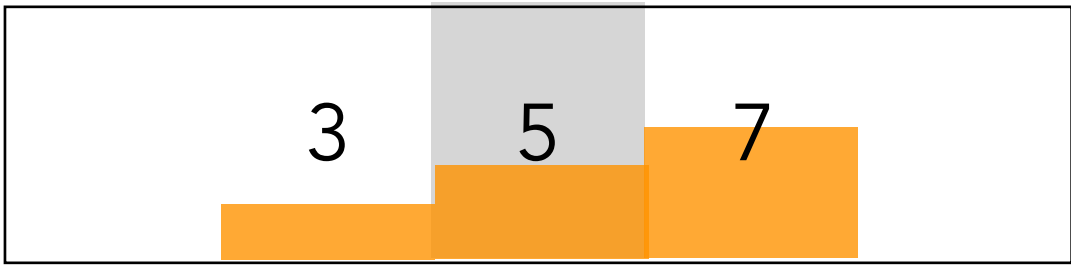

1 Strongly disagree 2 3 4 5 Strongly agree

Perceived Usability (PU)

PU1. I felt frustrated while using this visualization interface.

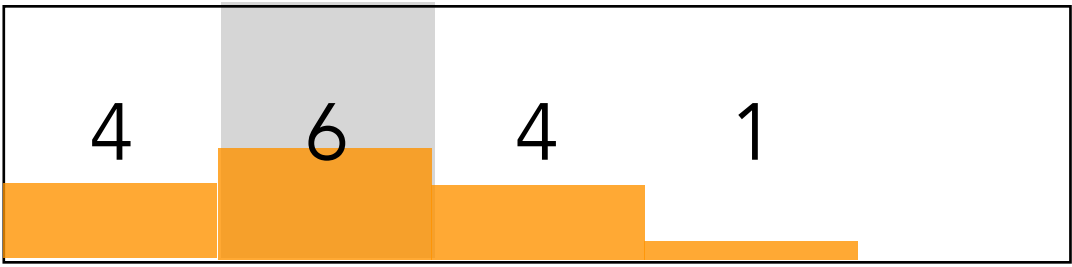

PU2. I found this visualization interface confusing to use.

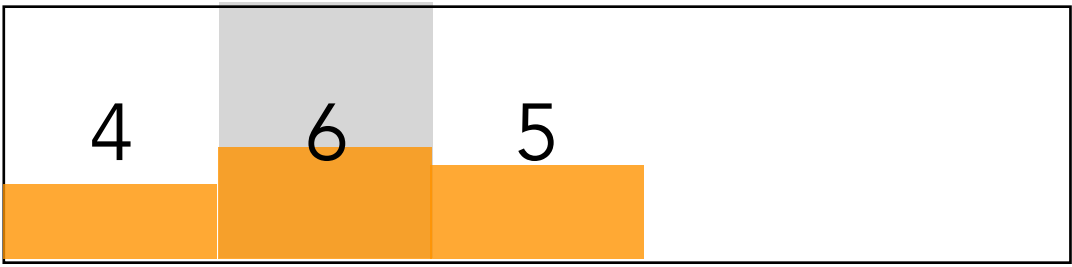

PU3. Using this visualization interface was taxing.

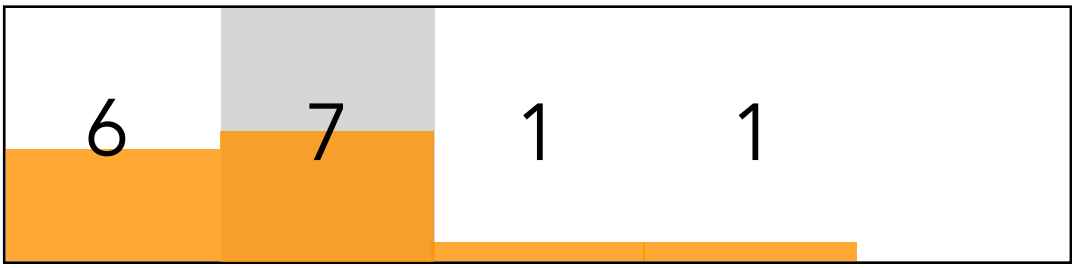

1 Strongly disagree 2 3 4 5 Strongly agree

Aesthetic Appeal (AA)

AA1. This visualization interface was attractive.

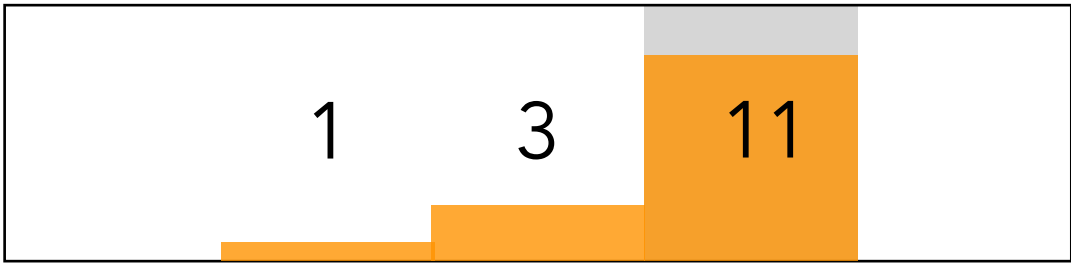

AA2. This visualization interface was aesthetically appealing.

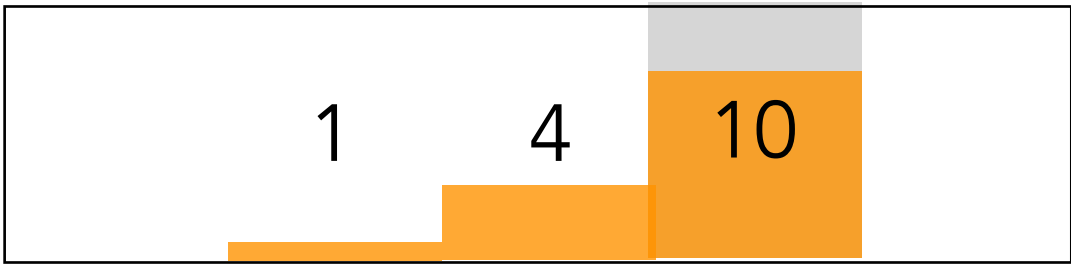

AA3. This visualization interface appealed to my senses.

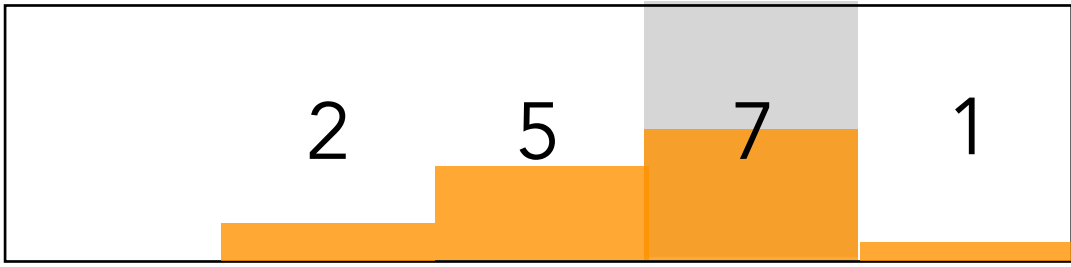

1 Strongly disagree 2 3 4 5 Strongly agree

Reward Factor (RF)

RF1. Using this visualization interface was worthwhile.

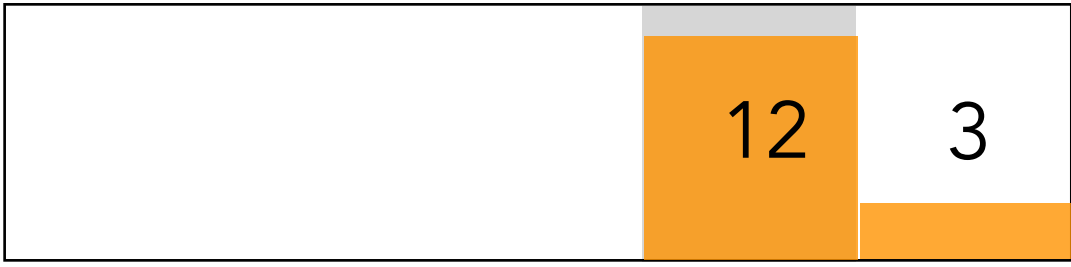

RF2. My experience was rewarding.

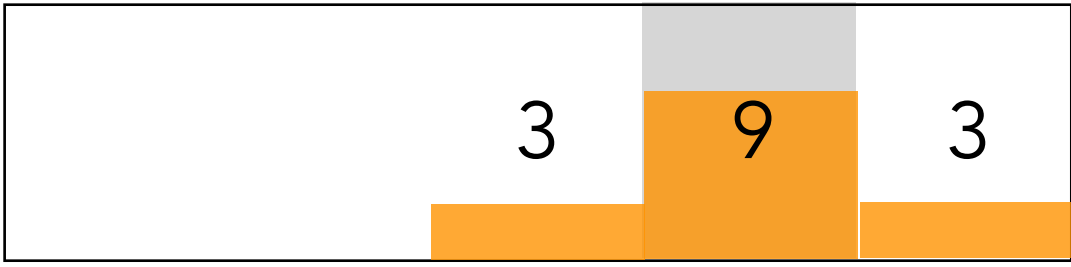

RF3. I felt interested in this experience.

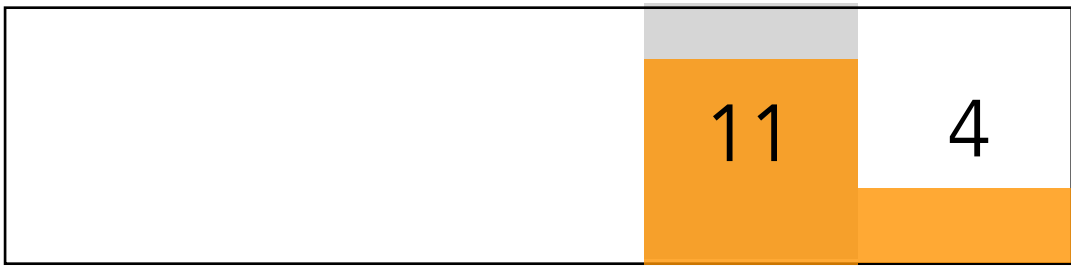

1 Strongly disagree 2 3 4 5 Strongly agree
