# Supplementary material
Source: ML conference proceedings conference paper supplement (https://openreview.net/forum?id=v38DXhUcoeU)
Supplement: supplementary_material [file attachment]

Here are the list of files and folder included in the supplementary material:

1. The **Log\_data** folder contains the interaction logs from the participant sessions. Using these logs, we computed
  - a. Participants' exploration time,
  - b. the time they spent reading the text descriptions,
  - c. the number of times they clicked on summary types,
  - d. the number of times they clicked on feature types,
  - e. the number of times they hovered on data points in the You\_graph,
  - f. the number of times they hovered on the Baseline\_graphs (Cohort and All graphs)

We computed the time spent in reading the text descriptions by computing the times when the mouse was in the text description area (marked by *mouseenter\_textDescription* and *mouseleave\_leaveDescription* labels in the interaction logs) and we corroborated these times from the participant videos.

2. The pre- and post- study questionnaires and their responses are in **Pre-study questionnaire.pdf**, **Post-study questionnaire.pdf**, **Pre-study\_questionnaire\_responses.csv**, and **Post-study\_questionnaire\_responses.csv**.
3. The questionnaire ratings and computed interaction log metrics are in the **Data\_analysis.csv** and Spearman's Correlations among these variables are in **SpearmanCorrelations.html**.
4. Additional study details are included in the **Additional details.pdf** and the **User\_Engagement\_responses.pdf** shows the individual items of and overall participant ratings for the user engagement questionnaire.
5. Instructions given to participants are included in the **Instructions.pdf**
