# Supplementary material
Source: ML conference proceedings conference paper supplement (https://openreview.net/forum?id=v38DXhUcoeU)
Supplement: supplementary_material [file attachment]

## Post-study questionnaire

Tesserae Participant ID: \_\_\_\_\_

Please indicate the extent you agree with the following statements by using the respective rating scale:

1. I lost myself in this experience.
  - ☐ Strongly disagree
  - ☐ Disagree
  - ☐ Neither agree nor disagree
  - ☐ Agree
  - ☐ Strongly agree
2. The time I spent using the visualization interface just slipped away.
  - ☐ Strongly disagree
  - ☐ Disagree
  - ☐ Neither agree nor disagree
  - ☐ Agree
  - ☐ Strongly agree
3. I was absorbed in this experience.
  - ☐ Strongly disagree
  - ☐ Disagree
  - ☐ Neither agree nor disagree
  - ☐ Agree
  - ☐ Strongly agree
4. I felt frustrated while using this visualization interface.
  - ☐ Strongly disagree
  - ☐ Disagree
  - ☐ Neither agree nor disagree
  - ☐ Agree
  - ☐ Strongly agree
5. I found this visualization interface confusing to use.
  - ☐ Strongly disagree
  - ☐ Disagree
  - ☐ Neither agree nor disagree

- Agree
  - Strongly agree
6. Using this visualization interface was taxing.
- Strongly disagree
  - Disagree
  - Neither agree nor disagree
  - Agree
  - Strongly agree
7. This visualization interface was attractive.
- Strongly disagree
  - Disagree
  - Neither agree nor disagree
  - Agree
  - Strongly agree
8. This visualization interface was aesthetically appealing.
- Strongly disagree
  - Disagree
  - Neither agree nor disagree
  - Agree
  - Strongly agree
9. This visualization interface appealed to my senses.
- Strongly disagree
  - Disagree
  - Neither agree nor disagree
  - Agree
  - Strongly agree
10. Using this visualization interface was worthwhile.
- Strongly disagree
  - Disagree
  - Neither agree nor disagree
  - Agree
  - Strongly agree
11. My experience was rewarding.
- Strongly disagree
  - Disagree
  - Neither agree nor disagree
  - Agree

- Strongly agree

12. I felt interested in this experience.

- Strongly disagree
- Disagree
- Neither agree nor disagree
- Agree
- Strongly agree

Please provide any other comments you have about the interface and other aspects of your personal data that you would like to see visualizations of:
